# Supplementary figures and images for: Dissociated Responses in Patients with Metastatic Solid Tumors Treated with Immunotherapy
Source: Springer Nature journal article supplement (doi:10.1007/s40268-021-00362-3), 2021-09-25

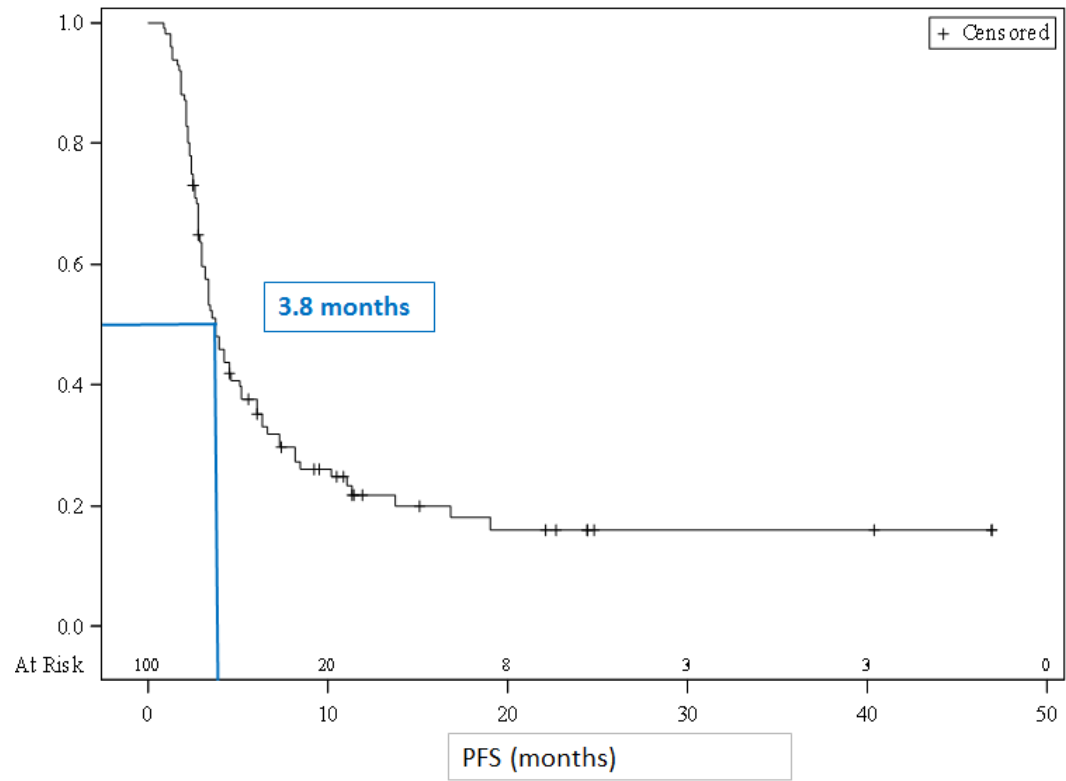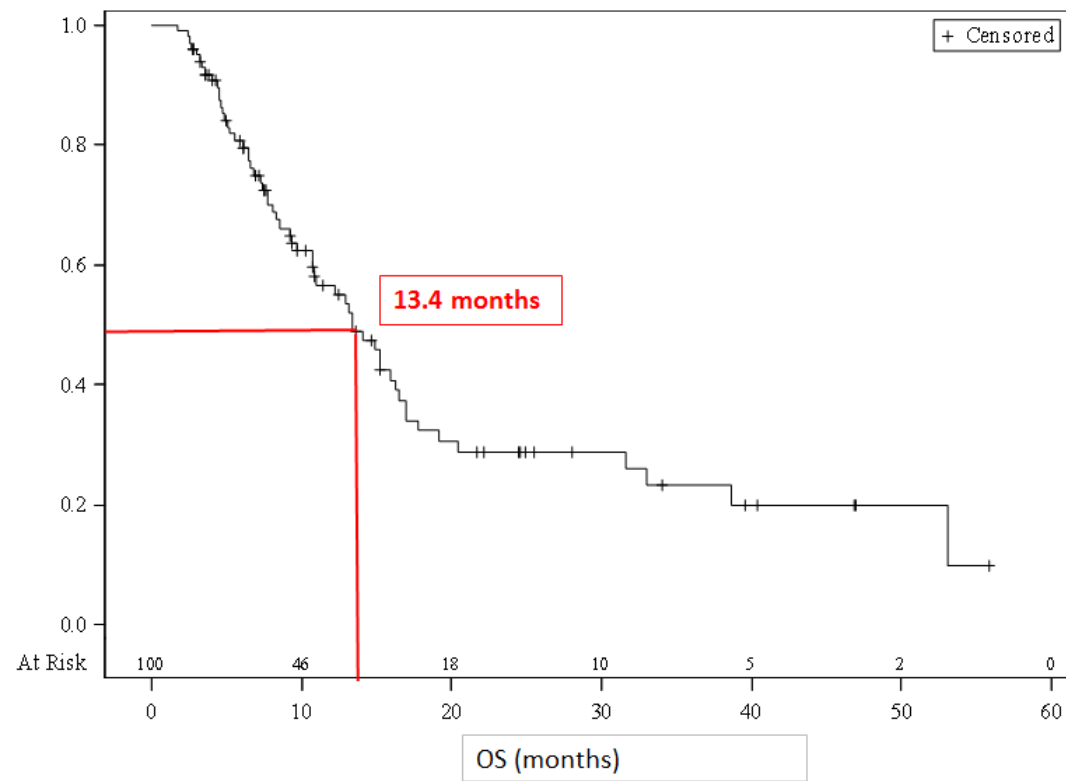

Supplement: MOESM1 [file 24126418]
